# Supplementary material
Source: PubMed Central journal article supplement (PMC6312406)
Supplement: NIHMS1507880-supplement-1.pdf [file NIHMS1507880-supplement-1.pdf]

**Appendix**  
**Breast Cancer Incidence by Stage Before and After Change in Screening Guidelines**  
**Guo et al.**

**Appendix Table 1.** Number of Cases of Breast Cancer Among Women Aged 40–74 Years, USCS 2006–2009 and 2011–2014

| Variable                                 | Number of cases (%) |                |                |                |
|------------------------------------------|---------------------|----------------|----------------|----------------|
|                                          | 40–49               |                | 50–74          |                |
|                                          | 2006–2009           | 2011–2014      | 2006–2009      | 2011–2014      |
| All                                      | 185,522 (100)       | 176,559 (100)  | 615,414 (100)  | 711,008 (100)  |
| All cases by race/ethnicity              |                     |                |                |                |
| Hispanic                                 | 17,896 (9.6)        | 20,582 (11.7)  | 39,029 (6.3)   | 51,121 (7.2)   |
| Non-Hispanic white                       | 132,902 (71.6)      | 118,926 (67.4) | 484,722 (78.8) | 541,650 (76.2) |
| Non-Hispanic black                       | 23,266 (12.5)       | 23,333 (13.2)  | 65,166 (10.6)  | 82,169 (11.6)  |
| Asian or Pacific Islander                | 8,715 (4.7)         | 10,924 (6.2)   | 19,327 (3.1)   | 26,885 (3.8)   |
| Invasive breast cancer                   | 140,115 (75.5)      | 132,879 (75.3) | 484,789 (78.8) | 563,475 (79.3) |
| Invasive breast cancer by race/ethnicity |                     |                |                |                |
| Hispanic                                 | 13,867 (7.5)        | 15,788 (8.9)   | 31,133 (5.1)   | 40,561 (5.7)   |
| Non-Hispanic white                       | 99,323 (53.5)       | 89,023 (50.4)  | 382,289 (62.1) | 431,821 (60.7) |
| Non-Hispanic black                       | 18,633 (10.0)       | 18,215 (10.3)  | 51,273 (8.3)   | 63,812 (9.0)   |
| Asian or Pacific Islander                | 6,288 (3.4)         | 7,875 (4.5)    | 14,583 (2.4)   | 20,187 (2.8)   |
| Stage of breast cancer <sup>a</sup>      |                     |                |                |                |
| Early stage                              | 45,406 (24.5)       | 43,681 (24.7)  | 130,626 (21.2) | 147,531 (20.7) |
| Localized                                | 78,721 (42.4)       | 76,784 (43.5)  | 304,634 (49.5) | 370,007 (52.0) |
| Regional                                 | 51,843 (27.9)       | 47,111 (26.7)  | 142,907 (23.2) | 150,810 (21.2) |
| Distant                                  | 6,574 (3.5)         | 6,610 (3.7)    | 26,414 (4.3)   | 32,449 (4.6)   |

*Notes:* Data were from U.S. Cancer Statistics (USCS), the combined data from the Centers for Disease Control and Prevention (CDC's) National Program for Cancer Registries (NPCR) and the National Cancer Institute's (NCI's) Surveillance, Epidemiology, and End Results (SEER) Program.

<sup>a</sup>Among cases with available information on stages.

**Appendix**  
**Breast Cancer Incidence by Stage Before and After Change in Screening Guidelines**  
 Guo et al.

**Appendix Figure 1.** Trends in age-adjusted incidence rate of invasive breast cancer by race/ ethnicity among women aged 40–49 years, 2006–2014.

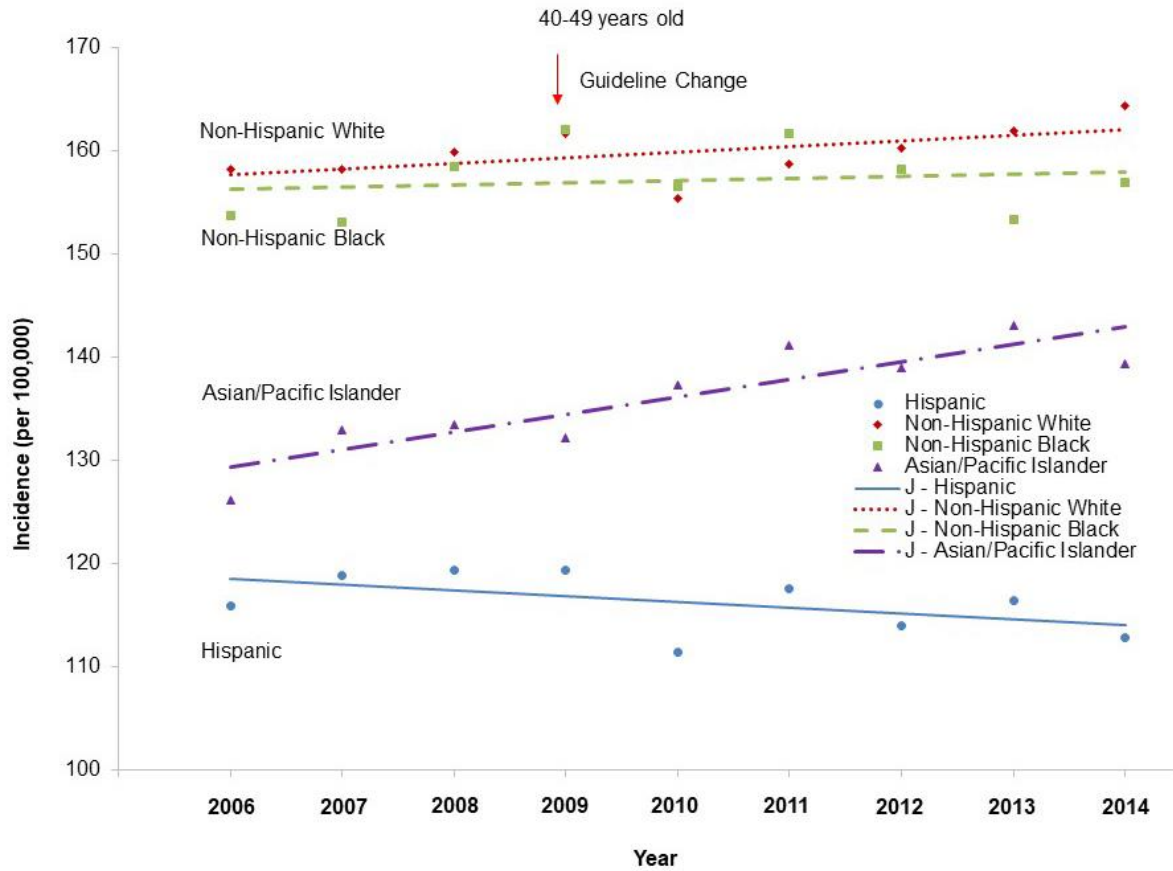

*Notes:* Red arrow indicates screening guideline change in 2009 for breast cancer. Lines were joinpoint regression lines.

Annual percentage changes (APC), 95% CI, and *p*-values:

Hispanic: 2006–2014 APC= −0.5, 95% CI= −1.2, 0.2, *p*=0.15

Non-Hispanic white: 2006–2014 APC=0.3, 95% CI= −0.1, 0.8, *p*=0.11

Non-Hispanic black: 2006–2014 APC=0.1, 95% CI= −0.6, 0.8, *p*=0.65

Asian/Pacific Islander: 2006–2014 APC=1.3, 95% CI=0.6, 1.9, *p*=0.002

J -, joinpoint regression line.

**Appendix**  
**Breast Cancer Incidence by Stage Before and After Change in Screening Guidelines**  
 Guo et al.

**Appendix Figure 2.** Trends in age-adjusted incidence rate of invasive breast cancer by race/ethnicity among women aged 50–74 years, 2006–2014.

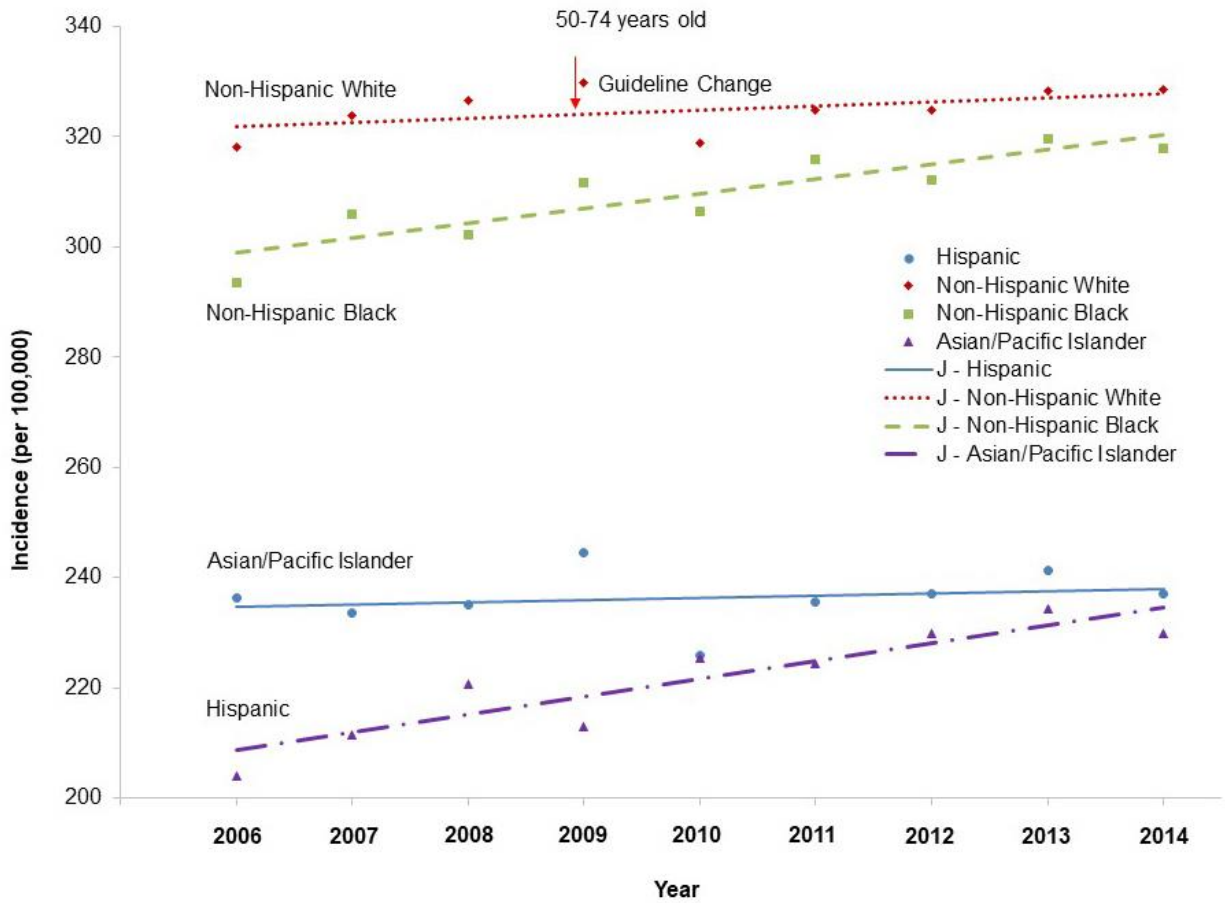

*Notes:* Red arrow indicates screening guideline change in 2009 for breast cancer. Lines were joinpoint regression lines.

Annual percentage changes (APC), 95% CI, and *p*-values:

Hispanic: 2006–2014 APC=0.2, 95% CI= -0.5, 0.8, *p*=0.58

Non-Hispanic white: 2006–2014 APC=0.2, 95% CI= -0.1, 0.6, *p*=0.17

Non-Hispanic black: 2006–2014 APC=0.9, 95% CI=0.5, 1.3, *p*=0.001

Asian/Pacific Islander: 2006–2014 APC=1.5, 95% CI=0.9, 2.1, *p*<0.001

J -, joinpoint regression line.
